# Supplementary material for: Diversity, antibacterial and phytotoxic activities of actinomycetes associated with Periplaneta fuliginosa
Source: PeerJ. 2024 Nov 25;12:e18575. doi: 10.7717/peerj.18575 (PMC11604042; doi:10.7717/peerj.18575)
Supplement: Supplemental Information 2 — The medium, phylogenetic analysis of all the isolates, colony morphology of some of the actinomycetes, phytotoxic activity effect graph of compound 4, NMR and MS data of all the compounds. [file peerj-12-18575-s002.xlsx]

## Sheet: Strains against E. crusgalli
Strain	Length of E. crusgalli roots (mm)
	1	2	3	4	5	6	7	8	9	10	11	12	13	14	15	16	17	18	19	20
ZLB-11	1.5	0	0	1	1	1	0	1.5	0	0	1	1	1	1	1	0	1	1	1	1
ZLB-12	3	0	1	0	0	2.5	0	2	5	1	1	3	0	2	2.5	4	2	0	0	3.5
ZLB-14	1.5	1	1.5	1.5	2	1.5	2	0	1.5	3.5	4	3	2.5	0	3	3	3	2	2.5	2
ZLB-15	0	1.5	1.5	0	1	1.5	1	1	1	1.5	1	1	2	0	0	1	1	1	0	0
ZLB-16	2	3	0	4.5	2.5	4.5	3	3	3	4.5	4	4.5	0	3	3	2.5	2.5	2	2	2
ZLB-18	0	0	1	1	0	0	1.5	1	0	0	2	2	0	0	0	0	0	1	0	0
ZLB-21	5.5	7	6.5	9	8	5	10	5.5	7.5	6	8.5	9.5	7	6.5	5.5	8	10	5	9.5	7.5
ZLB-23	1.5	1	1.5	1.5	2	1.5	2	0	1.5	3.5	4	3	2.5	0	3	3	3	2	2.5	2
ZLB-24	0	0	0	0	0	0	0	0	0	0	0	0	0	0	0	0	0	0	0	0
ZLB-27	3.5	1	1	1	1	1	1.5	1	1	1	0	1	1	1	1	1	0	1	1	1
ZLB-32	6.5	6	7	5.5	6.5	6	7.5	5	7	6.5	5.5	6	7.5	6.5	7	5.5	6	7	5.5	6.5
ZLC-45	1.5	2	2.5	2	3	2.5	2	2	4	2	5	1	2.5	1	3	3	3	0	2.5	2
ZLC-46	0	1	1	0	0	1	1	0	0	0	0	1	3	1	1	1	1	1	1	1
ZLC-47	0	1.5	1	1	0	0	1.5	1	1	1	0	2	2	1	1.5	1.5	2.5	1	1.5	4
ZLC-48	0	0	1	1	0	1.5	2	2.5	0	1	0	1	1	1	0	2	1	1.5	1.5	1
ZLC-49	1	1	1	3	1.5	1	1	1	2	2	0	1	1	1	1	1	0	1	1.5	1.5
ZLC-50	1	2	1	0	2.5	2	3	1	2	2	1	1	1	2	2	1	3	0	0	1
ZLC-51	1	2	1	1.5	2	2.5	2.5	1.5	3	2	2	1.5	1.5	2	2	1.5	1.5	2.5	2.5	3.5
ZLC-52	4	1.5	2.5	3	3	3	0	4	2	3.5	3	3	3.5	4	3	2	2.5	1	0	1
ZLC-56	2	2	2.5	0	2.5	2	1.5	0	0	2	1	0	1	1	2	1.5	0	3	1	2
ZLC-57	3.5	3.5	3.5	4	3.5	3.5	0	2	2.5	1	2.5	2.5	1	2.5	3.5	3	0	2.5	3	3.5
ZLC-58	2	2	2	1	1	1.5	3	2	1.5	2	3.5	4	3.5	1.5	2	1.5	1.5	2	1.5	0
ZLC-59	1.5	2.5	1.5	1.5	1	2	2	2	0	1	0	0	1	1	1	0	1	0	1	1
ZLC-65	0	0	0	1	1	2	3	2.5	4	3.5	1	1.5	2	1.5	2	2.5	2	3	1.5	3.5
ZLC-81	7	6.5	6	7.5	5.5	6	7	6.5	5	6	7.5	6	6.5	7	5.5	7	6	7.5	6.5	6
ZLC-85	0	0	1	1	1.5	2	0	0	2	3	2.5	0	3	1	1	1	1	1	2.5	2
ZLC-87	2	1	1.5	0	0	0	0	0	1	1.5	1	0	0	0	1.5	0	0	0	1	1.5
ZLC-95	6	5.5	6.5	6	4	6.5	5.5	7	6	5.5	6.5	7	6.5	5	6	5.5	5	6.5	5.5	6
ZLC-96	8	5	6.5	7	6	5.5	7	4.5	6	5	7.5	4	6.5	6	7	5.5	8	5	6	6.5
ZLC-97	7.5	4	6.5	7	5	3.5	8	4.5	6	7.5	5.5	6	4	7	3.5	6.5	7	4.5	6	5.5
ZLC-101	6	7.5	6.5	5.5	6	7	6.5	5	7	6.5	7.5	6	7	5.5	6.5	7	5	6.5	7	6
ZLC-102	6.5	4	7	5.5	6	7.5	3.5	6	7	4.5	6.5	3.5	7	4	6.5	5	7.5	4.5	6	5.5
ZLC-103	4	7.5	7	6	7	5	8	3	7.5	6	4	8	5	7	6.5	4	8	4.5	6	6.5
ZLC-105	1	1	1	1	1	0	0	2.5	2.5	2.5	0	0	2	2.5	3	2.5	0	3	2	2
ZLC-106	0	2	2	3.5	3	3	2	2	2	2	3	0	2.5	3.5	3	3	3.5	4	0	3.5
ZLC-107	3	2	2	0	2	3	1.5	2	2.5	2.5	1.5	2	1.5	2	2	2.5	2.5	0	3	2.5
CK	7	5	8.5	5	5	6	5	5	6	7.5	6	5	7	6	5.5	5	4.5	5	5.5	6
2,4-D	0	0	0	0	0	0	0	0	0	0	0	0	0	0	0	0	0	0	0	0

## Sheet: Compounds against E. crusgalli
Compound	Length of E. crusgalli roots (mm)
	1	2	3	4	5	6	7	8	9	10	11	12	13	14	15	16	17	18	19	20	21	22	23	24	25	26	27	28	29	30
1	13	19.5	18	10	16.5	7.5	22	13	17.5	20	15	11.5	18.5	23	20	8.5	16	13	19.5	12.5	25	11	18	10.5	19	14	16.5	24.5	20	9.5
2	12	18.5	20	10	15.5	8.5	19	13	17.5	20	14	17	19.5	10	18	9	16.5	13	20	12.5	17	21	18.5	22	20	12	14.5	17	21.5	19.5
3	19	24	17.5	22	20.5	25	23.5	18	22.5	19.5	24	20	23	21	19	24.5	18.5	21.5	22	20.5	23.5	19	21	20	24.5	18.5	23	21.5	19.5	22
4	14.5	6	9.5	9.5	12	6.5	17	11.5	16.5	6	12	6.5	9	8.5	4	9	3.5	6	5.5	9.5	6.5	7.5	6	4.5	0.5	1.5	3.5	2	4.5	5.5
5	7	23.5	24	5	8.5	6	8.5	5	17.5	5.5	6.5	5.5	16	7.5	6	9	24.5	5.5	7	4.5	5.5	6.5	6	5.5	7.5	20	25.5	26	24	21.5
6	5	12	17	5.5	9	12	11	14	16	21.5	4.5	12	12	9	22	13	13	10	18	3.5	12	13	12	7	13	6	13	15	4	11
7	20	19.5	21	22	23	24	23	16	22	21	16.5	14	12.5	23	30	7	12	14	14	23	23	9	25	23	11.5	24.5	12	19	16	32
CK	20	20	22	21	23	24	23	22	21	26	26	26	23	30	26	12	21	20	23	23	20	16	27	14.5	13	14.5	22	16	20	31
2, 4-D	0	0	0	0	0	0	0	0	0	0	0	0	0	0	0	0	0	0	0	0	0	0	0	0	0	0	0	0	0	0

## Sheet: Compounds against A.theophrasti
Compound	Length of A. theophrasti roots (mm)
	1	2	3	4	5	6	7	8	9	10	11	12	13	14	15	16	17	18	19	20	21	22	23	24	25	26	27	28	29	30
1	0.5	1	4.5	3	0	5	2.5	4	1.5	0	3.5	5	2	4.5	1	0.5	3	2.5	4	1.5	4	4.5	4	2.5	4.5	1	4	3	2.5	5
2	12.5	9.5	13	8	11.5	14	10	13.5	9	12	14.5	7.5	11	13.5	9.5	14	8.5	11.5	12.5	10	13	8.5	11.5	14	7.5	12	10.5	13.5	9	11
3	11	12.5	10	14.5	9	13.5	7.5	12	8.5	14	10.5	13	7	12.5	9.5	11	14.5	8	13	10.5	14	8.5	13.5	9	12	10	14.5	8	13	9.5
4	9.5	3	9.5	0.5	0.5	0	0	0	0	0	0	0	0	0	0	0	0	0	0	0	0	0	0	0	0	0	0	0	0	0
5	11	13.5	9	12	14.5	8	11.5	14	7.5	12.5	10	13	9.5	12	14	7	11.5	10.5	14.5	8.5	12	13.5	9	11	14	8	12.5	10	13	9.5
6	14	10.5	13	7.5	15	8	13.5	11	14.5	9.5	12	14	8.5	13	10	14.5	9	13.5	11.5	15	8	14	12.5	7.5	13	11	14.5	9	13.5	10
7	15	12.5	10.5	16	4.5	5.5	20	2.5	15	7.5	10	14	13	12	10	17	10	14.5	4	2.5	3.5	4.5	2	2.5	9	10	11	14	4.5	5
CK	15.5	15.5	20	21.5	16.5	18	10	15	13.5	7	6.5	7	7	4	1.5	8	7.5	4.5	5	7	7	4.5	5.5	8	9	14	13	12	14	17
2, 4-D	0	0	0	0	0	0	0	0	0	0	0	0	0	0	0	0	0	0	0	0	0	0	0	0	0	0	0	0	0	0
